# Supplementary material for: Regional Specializations of the PAZ Proteomes Derived from Mouse Hippocampus, Olfactory Bulb and Cerebellum
Source: Proteomes. 2015 May 13;3(2):74–88. doi: 10.3390/proteomes3020074 (PMC5217373; doi:10.3390/proteomes3020074)
Supplement: Supplementary File 1 [file proteomes-03-00074-s001.zip › proteomes-03-00074-supplementary-S1.xlsx]

## Sheet: Olfactory bulb
No.	UniProt Entry	UniProt (Mouse)	Description	Most Pep.	Score for Most Pep.	SC for Most Pep. (%)		Olfactory bulb
1	Q64433	CH10	10 kDa heat shock protein, mitochondrial (Hsp10), Chaperonin 10 (CPN10)	18	731	52
2	P62259	1433E	14-3-3 protein epsilon (14-3-3E)	11	327	19.2
3	P61982	1433G	14-3-3 protein gamma	8	146	28.3
4	P68254	1433T	14-3-3 protein theta, 14-3-3 protein tau	7	138	26.9
5	P63101	1433Z	14-3-3 protein zeta/delta, Protein kinase C inhibitor protein 1 (KCIP-1)	16	491	41.6
6	P16330	CN37	2',3'-cyclic-nucleotide 3'-phosphodiesterase (CNP, CNPase)	23	788	26.9
7	P63038	CH60	60 kDa heat shock protein, mitochondrial, HSP-65	11	318	16.4
8	Q99KI0	ACON	Aconitate hydratase, mitochondrial (Aconitase)	22	787	19.9
9	P60710	ACTB	Actin, cytoplasmatic 1	40	1223	35.7
10	P31786	ACBP	Acyl-CoA-binding protein (ACBP)	8	291	39.1
11	P48962	ADT1	ADP/ATP translocase 1	22	497	24.2
12	P51881	ADT2	ADP/ATP translocase 2	26	534	33.2
13	P17182	ENOA	Alpha-enolase	24	787	27.4
14	P05202	AATM	Aspartate aminotransferase, mitochondrial (mAspAT)	15	578	13.5
15	Q03265	ATPA	ATP synthase subunit alpha, mitochondrial	58	2333	47.7
16	P56480	ATPB	ATP synthase subunit beta, mitochondrial	81	3066	67.5
17	Q9DB20	ATPO	ATP synthase subunit O, mitochondrial, Oligomycin sensitivity conferral protein (OSCP)	8	218	31.9
18	P97450	ATP5J	ATP synthase-coupling factor 6, mitochondrial (ATPase subunit F6)	15	685	35.2
19	Q91XV3	BASP1	brain acid soluble protein 1, Neuronal axonal membrane protein 22kDa (NAP-22)	38	1745	61.1
20	P11798	KCC2A	Calcium/calmodulin-dependent protein kinase type II subunit alpha (CaM Kinase II subunit alpha, CaMK-II subunit alpha)	31	793	27
21	P28652	KCC2B	Calcium/calmodulin-dependent protein kinase type II subunit beta (CaM Kinase II subunit beta, CaMK-II subunit beta)	22	505	21.4
22	P62204	CALM	Calmodulin (CaM)	20	665	43
23	Q08331	CALB2	Calretinin (CR)	8	209	21.4
24	Q9JKC6	CEND	Cell cycle exit and neuronal differentiation protein 1, BM88 antigen	5	144	16.8
25	Q9CZU6	CISY	Citrate synthase, mitochondrial	13	390	12.7
26	P18760	COF1	Cofilin-1	7	134	37.3
27	Q04447	KCRB	Creatine kinase B-type (B-CK)	40	1212	41.5
28	Q9CZ13	QCR1	Cytochrome b-c1 complex subunit 1, mitochondrial, Complex III subunit I, Core protein I	12	341	8.3
29	Q9DB77	QCR2	Cytochrome b-c1 complex subunit 2, mitochondrial, Complex III subunit 2, Core protein II	20	435	25.4
30	P99028	QCR6	Cytochrome b-c1 complex subunit 6, mitochondrial, Complex III subunit 6	3	100	16.9
31	P00405	COX2	Cytochrome c oxidase subunit 2, Cytochrome c oxidase polypeptide II	6	231	20.3
32	P19783	COX41	Cytochrome c oxidase subunit 4 isoform 1, mitochondrial, Cytochrome c oxidase subunit IV isoform 1	5	233	45
33	P12787	COX5A	Cytochrome c oxidase subunit 5A, mitochondrial	9	203	16.4
34	P19536	COX5B	Cytochrome c oxidase subunit 5B, mitochondrial	4	97	18
35	P56391	CX6B1	Cytochrome c oxidase subunit 6B1 (COX VIb-1)	10	213	19.8
36	P62897	CYC	Cytochrome c, somatic	6	131	38.1
37	O08553	DPYL2	Dihydropyrimidinase-related protein 2 (DRP-2), Unc-33-like phosphoprotein 2 (ULIP-2)	21	566	26
38	P56564	EAA1	Excitatory amino acid transporter 1, High-affinity neuronal glutamate transporter, Sodium-dependent glutamate/aspartate transporter 1 (GLAST-1)	8	272	8.5
39	P43006	EAA2	Excitatory amino acid transporter 2, GLT-1 , Sodium-dependent glutamate/aspartate transporter 2	12	416	13.3
40	P05064	ALDOA	Fructose-bisphosphate aldolase A	16	466	25.8
41	P17183	ENOG	Gamma-enolase, Neuron-specific enolase (NSE)	7	142	14.5
42	P16858	G3P	Glyceraldehyde-3-phosphate dehydrogenase (GAPDH)	11	508	14.7
43	P62874	GBB1	Guanine nucleotide-binding protein G(I)/G(S)/G(T) subunit beta-1, Transducin beta chain 1	10	274	9.4
44	P18872-2	GNAO-2	Guanine nucleotide-binding protein G(o) subunit alpha, Isoform 2	17	586	24.3
45	Q8CGK7	GNAL	Guanine nucleotide-binding protein G(olf) subunit alpha, Adenylate cyclase-stimulating G alpha protein, olfactory type	6	334	14.7
46	P63017	HSP7C	Heat shock cognate 71 kDa protein, Heat shock 70 kDa protein 8	32	1044	27.1
47	Q6ZWY9	H2B1C	Histone H2B type 1-C/E/G	20	622	34.9
48	P62806	H4	Histone H4	19	827	50.5
49	Q8BGZ7	K2C75	Keratin, type II cytoskeletal 75	3	102	3.8
50	P08249	MDHM	Malate dehydrogenase, mitochondrial	31	1100	37.3
51	P04370-4	MBP-4	Myelin basic protein (MBP), Isoform 4	26	664	33.8
52	P60202	MYPR	Myelin proteolipid protein (PLP)	14	380	11.6
53	P26645	MARCS	Myristoylated alinine-rich C-kinase substrate (MARCKS)	5	117	20.1
54	Q62425	NDUA4	NADH dehydrogenase [ubiquinone] 1 alpha subcomplex subunit 4 (Complex I-MLRQ)	3	156	26.8
55	Q9D6J6	NDUV2	NADH dehydrogenase [ubiquinone] flavoprotein 2, mitochondrial	4	272	31.5
56	P13595	NCAM1	Neural cell adhesion molecule 1 (NCAM-1, N-CAM-1)	26	891	25
57	P06837	NEUM	Neuromodulin, Calmodulin-binding protein P-57	13	437	42.7
58	Q64288	OMP	Olfactory marker protein	23	1019	41.1
59	Q9Z0P4	PALM	Paralemmin-1	4	111	8.4
60	P17742	PPIA	Peptidyl-prolyl cis-trans isomerase A (PPIase A)	9	244	22
61	P99029	PRDX5	Peroxiredoxin-5, mitochondrial	7	162	23.8
62	Q8VEM8	MPCP	Phosphate carriar protein, mitochondrial; phospate transport protein (PTP)	14	409	18.5
63	P63054	PCP4	Purkinje cell protein 4, Brain-specific polypeptide PEP-19	6	147	41.9
64	Q9D051	ODPB	Pyruvat dehydrogenase E1 component subunit beta, mitochondrial (PDHE1-B)	8	203	16.4
65	P52480-2	KPYM-2	Pyruvat kinase isozymes M1/M2, Isoform 2	23	556	21.7
66	P35486	ODPA	Pyruvate dehydrogenase E1 component subunit alpha, somatic form, mitochondrial (PDH1-A type I)	7	187	17.7
67	P61027	RAB10	Ras-related protein Rab-10	11	334	21
68	P63011	RAB3A	Ras-related protein Rab-3A	16	570	33.2
69	P31650	S6A11	Sodium- and chloride-dependent GABA transporter 3 (GAT-3)	17	484	7.5
70	Q8VDN2	AT1A1	Sodium/potassium-transporting ATPase subunit alpha-1 (Na+/K+-ATPase alpha-1 subunit)	70	2611	27.8
71	Q6PIE5	AT1A2	Sodium/potassium-transporting ATPase subunit alpha-2 (Na+/K+-ATPase alpha-2 subunit)	59	2316	27.9
72	Q6PIC6	AT1A3	Sodium/potassium-transporting ATPase subunit alpha-3 (Na+/K+-ATPase alpha-3 subunit)	70	2777	27.6
73	P14094	AT1B1	Sodium/potassium-transporting ATPase subunit beta-1 (Na+/K+-ATPase beta-1 subunit)	23	707	30.3
74	P14231	AT1B2	Sodium/potassium-transporting ATPase subunit beta-2 (Na+/K+-ATPase beta-2 subunit)	3	68	4.1
75	P16546	SPTN1	Spectrin alpha chain, brain, (non-erythrocytic 1)	15	325	8.7
76	P54227	STMN1	Stathmin	8	292	32.9
77	P08228	SODC	Superoxide dismutase [Cu-Zn]	9	206	32.5
78	P09671	SODM	Superoxide dismutase [Mn], mitochondrial	4	120	17.6
79	P60879	SNP25	Synaptosomal-associated protein 25 (SNAP-25)	13	349	37.4
80	P46096	SYT1	Synaptotagmin-1 (Syt-1, SytI)	25	780	27.6
81	P61264	STX1B	Syntaxin-1B	26	928	38.5
82	O08599	STXB1	Syntaxin-binding protein 1, Protein unc-18 homolog 1 (Unc18-1)	23	668	31.6
83	P01831	THY1	Thy-1 membrane glycoprotein	6	112	13.6
84	P68369	TBA1A	Tubulin alpha-1A chain (Alpha-tubulin 1)	61	2006	36.8
85	P05213	TBA1B	Tubulin alpha-1B chain (Alpha-tubulin 2)	57	1863	36.8
86	P68368	TBA4A	Tubulin alpha-4A chain (Alpha-tubulin 4)	39	1061	28.3
87	Q7TMM9	TBB2A	Tubulin beta-2A chain	83	3248	51.5
88	Q9ERD7	TBB3	Tubulin beta-3 chain	55	2368	34.4
89	Q9D6F9	TBB4A	Tubulin beta-4A chain, Tubulin beta-4 chain	63	2517	38.3
90	P68372	TBB4B	Tubulin beta-4B chain, Tubulin beta-2C chain	83	3377	45.4
91	P99024	TBB5	Tubulin beta-5 chain	71	2920	51.6
92	P62983	RS27A	Ubiquitin-40S ribosomal protein S27a	8	147	21.8
93	P63044	VAMP2	Vesicle-associated membrane protein 2 (VAMP-2), Synaptobrevin-2	11	600	28.4
94	Q60932	VDAC1	Voltage-dependent anion-selective channel protein 1 (VDAC-1)	22	976	27.7
95	Q60931	VDAC3	Voltage-dependent anion-selective channel protein 3 (VDAC-3)	15	755	12
96	P50516	VATA	V-type proton ATPase catalytic subunit A (V-ATPase subunit A)	19	668	16.9

## Sheet: Hippocampus
No.	UniProt Entry	UniProt (Mouse)	Description	Most Pep.	Score for Most Pep.	SC for Most Pep. (%)		Hippocampus
1	Q64433	CH10	10 kDa heat shock protein, mitochondrial (Hsp10), Chaperonin 10 (CPN10)	6	163	28.4
2	Q9CQV8	1433B	14-3-3 protein beta/alpha	10	245	21.1
3	P62259	1433E	14-3-3 protein epsilon (14-3-3E)	13	348	36.5
4	P61982	1433G	14-3-3 protein gamma	14	312	21.1
5	P63101	1433Z	14-3-3 protein zeta/delta, Protein kinase C inhibitor protein 1 (KCIP-1)	20	669	40.4
6	P16330	CN37	2',3'-cyclic-nucleotide 3'-phosphodiesterase (CNP, CNPase)	42	1371	31.9
7	P61922	GABT	4-aminobutyrate aminotransferase, mitochondrial, GABA aminotransferase (GABA-AT)	12	283	17
8	P63038	CH60	60 kDa heat shock protein, mitochondrial, HSP-65	20	422	30.5
9	Q8QZT1	THIL	Acetyl-CoA acetyltransferase, mitochondrial	7	124	17.5
10	Q99KI0	ACON	Aconitate hydratase, mitochondrial (Aconitase)	45	1461	28.5
11	P60710	ACTB	Actin, cytoplasmatic 1	44	1212	41.6
12	P48962	ADT1	ADP/ATP translocase 1	27	590	24.5
13	P51881	ADT2	ADP/ATP translocase 2	16	452	21.1
14	P17182	ENOA	Alpha-enolase	22	786	26.7
15	Q9DB05	SNAA	Alpha-soluble NSF attachment protein (SNAP-alpha)	6	170	3.7
16	P17426	AP2A1	AP-2 complex subunit alpha-1	4	65	4.4
17	Q9DBG3	AP2B1	AP-2 complex subunit beta	25	631	17.2
18	P05201	AATC	Aspartate aminotransferase, cytoplasmic (Transaminase A)	6	114	20.6
19	P05202	AATM	Aspartate aminotransferase, mitochondrial (mAspAT)	16	595	15.6
20	Q8BH66	ATLA1	Atlastin-1	2	37	2
21	Q03265	ATPA	ATP synthase subunit alpha, mitochondrial	76	3030	30.6
22	P56480	ATPB	ATP synthase subunit beta, mitochondrial	113	3595	58.6
23	Q9DCX2	ATP5H	ATP synthase subunit d, mitochondrial (ATPase subunit d)	7	135	21.7
24	Q9DB20	ATPO	ATP synthase subunit O, mitochondrial, Oligomycin sensitivity conferral protein (OSCP)	16	525	39.9
25	Q91XV3	BASP1	brain acid soluble protein 1, Neuronal axonal membrane protein 22kDa (NAP-22)	14	620	44.2
26	P11798	KCC2A	Calcium/calmodulin-dependent protein kinase type II subunit alpha (CaM Kinase II subunit alpha, CaMK-II subunit alpha)	56	1997	28.9
27	P28652	KCC2B	Calcium/calmodulin-dependent protein kinase type II subunit beta (CaM Kinase II subunit beta, CaMK-II subunit beta)	29	1150	22
28	Q8BH59	CMC1	Calcium-binding mitochondrial carrier protein Aralar1, Mitochondrial aspartate glutamate carrier 1	27	517	22.3
29	P62204	CALM	Calmodulin (CaM)	5	107	47
30	P00920	CAH2	Carbonic anhydrase 2 (CA-II), Carbonate dehydratase II	5	110	9.6
31	Q61301-2	CTNA2-2	Catenin alpha-2, Alpha N-catenin, Isoform 2	3	38	12.2
32	Q9JKC6	CEND	Cell cycle exit and neuronal differentiation protein 1, BM88 antigen	3	54	25.5
33	Q9CZU6	CISY	Citrate synthase, mitochondrial	28	700	25.6
34	Q61548	AP180	Clathrin coat assembly protein AP180	18	300	13.1
35	Q68FD5	CLH1	Clathrin heavy chain 1	23	396	8.5
36	P18760	COF1	Cofilin-1	4	99	25.3
37	P12960	CNTN1	Contactin-1, neuronal cell surface protein F3	13	291	11.1
38	Q04447	KCRB	Creatine kinase B-type (B-CK)	18	468	29.1
39	P30275	KCRU	Creatine kinase U-type, mitochondrial	8	215	15.3
40	Q9DB77	QCR2	Cytochrome b-c1 complex subunit 2, mitochondrial, Complex III subunit 2, Core protein II	14	684	26.3
41	P12787	COX5A	Cytochrome c oxidase subunit 5A, mitochondrial	8	114	42.5
42	P19536	COX5B	Cytochrome c oxidase subunit 5B, mitochondrial	3	66	24.2
43	Q91V12	BACH	Cytosolic acyl coenzyme A thioester hydrolase	5	76	2.9
44	O08749	DLDH	Dihydrolipoyl dehydrogenase, mitochondrial	14	467	12.4
45	Q8BMF4	ODP2	Dihydrolipoyllysine-residue acetyltransferase component of pyruvate dehydrogenase complex, mitochondrial (PDC-E2)	11	328	13.1
46	Q9D2G2	ODO2	Dihydrolipoyllysine-residue succinyltransferase component of 2-oxoglutarate dehydrogenase complex, mitochondrial (OGDC-E2)	3	103	8.4
47	P97427	DPYL1	Dihydropyrimidinase-related protein 1 (DRP-1), Unc-33-like phosphoprotein 3 (ULIP-3)	5	103	17.5
48	O08553	DPYL2	Dihydropyrimidinase-related protein 2 (DRP-2), Unc-33-like phosphoprotein 2 (ULIP-2)	35	765	33.2
49	P39053	DYN1	Dynamin-1	16	366	14.8
50	Q8BFR5	EFTU	Elongation factor Tu, mitochondrial	3	89	3.1
51	P56564	EAA1	Excitatory amino acid transporter 1, High-affinity neuronal glutamate transporter, Sodium-dependent glutamate/aspartate transporter 1 (GLAST-1)	11	553	6.4
52	P43006	EAA2	Excitatory amino acid transporter 2, GLT-1 , Sodium-dependent glutamate/aspartate transporter 2	25	969	11.9
53	P47753	CAZA1	F-actin-capping protein subunit alpha-1	3	53	3.5
54	P05064	ALDOA	Fructose-bisphosphate aldolase A	12	320	30.8
55	P05063	ALDOC	Fructose-bisphosphate aldolase C, Brain-type aldolase	12	440	14.9
56	P17183	ENOG	Gamma-enolase, Neuron-specific enolase (NSE)	20	488	32.5
57	P06745	G6PI	Glucose-6-phosphate isomerase (GPI), Neuroleukin (NLK)	12	244	9.7
58	P19157	GSTP1	Glutathione S-transferase P 1, GST P1	4	134	5.2
59	P16858	G3P	Glyceraldehyde-3-phosphate dehydrogenase (GAPDH)	30	1195	25.8
60	P18872	GNAO	Guanine nucleotide-binding protein G(o) subunit alpha	31	1117	33.1
61	P21279	GNAQ	Guanine nucleotide-binding protein G(q) subunit alpha	7	124	17
62	P63017	HSP7C	Heat shock cognate 71 kDa protein, Heat shock 70 kDa protein 8	38	1152	24.6
63	P11499	HS90B	Heat shock protein HSP 90-beta, Heat shock 84 kDa (HSP 84)	7	167	6.4
64	P17710	HXK1	Hexokinase-1	15	492	9
65	P15864	H12	Histone H1.2	4	109	10.8
66	Q6GSS7	H2A2	Histone H2A type 2-A	21	871	26.9
67	P27661	H2AX	Histone H2A.x	9	177	27.3
68	P02301	H3C	Histone H3.3C	4	104	6.6
69	P62806	H4	Histone H4	28	1132	41.7
70	Q9D6R2	IDH3A	Isocitrate dehydrogenase [NAD] subunit alpha, mitochondrial	10	336	31.1
71	Q61735	CD47	Leukocyte surface antigen CD47, Integrin-associated protein (IAP)	5	166	4.6
72	P16125	LDHB	L-lactate dehydrogenase B chain (LDH-B)	8	241	13.8
73	P34884	MIF	Macrophage migration inhibitory factor (MIF)	5	143	9.6
74	P14152	MDHC	Malate dehydrogenase, cytoplasmic	5	141	15.9
75	P08249	MDHM	Malate dehydrogenase, mitochondrial	48	2027	30.8
76	P60202	MYPR	Myelin proteolipid protein (PLP)	13	380	11.6
77	Q61885	MOG	Myelin-oligodendrocyte glycoprotein	14	517	8.9
78	Q8VDQ8	SIR2	NAD-dependent protein deacetylase sirtuin-2, SIR2-like protein 2 (mSIR2L2)	11	438	9.5
79	Q99LC3	NDUAA	NADH dehydrogenase [ubiquinone] 1 alpha subcomplex subunit 10, mitochondrial (Complex I-42kD)	7	198	9.3
80	Q9ERS2	NDUAD	NADH dehydrogenase [ubiquinone] 1 alpha subcomplex subunit 13, Cell death regulatory protein GRIM-19	6	178	22.9
81	Q9D6J6	NDUV2	NADH dehydrogenase [ubiquinone] flavoprotein 2, mitochondrial	5	100	8.5
82	Q9DCT2	NDUS3	NADH dehydrogenase [ubiquinone] iron-sulfur protein 3, mitochondrial (Complex I-30kD)	5	91	19.8
83	Q91VD9	NDUS1	NADH-ubiquinone oxidoreductase 75 kDa subunit, mitochondrial	16	356	12.7
84	Q9Z0E0	NCDN	Neurochondrin, M-Sema F-associating protein of 75 kDa, Norbin	4	90	3.2
85	Q9Z1S5	SEPT3	Neuronal-specific septin-3	3	38	5.1
86	O35874	SATT	Neutral amino acid transporter A	5	199	2.1
87	P17742	PPIA	Peptidyl-prolyl cis-trans isomerase A (PPIase A)	4	120	31.1
88	P99029	PRDX5	Peroxiredoxin-5, mitochondrial	14	382	24.3
89	O08709	PRDX6	Peroxiredoxin-6	3	92	10.3
90	Q8VEM8	MPCP	Phosphate carriar protein, mitochondrial; phospate transport protein (PTP)	7	264	12.6
91	Q9DBJ1	PGAM1	Phosphoglycerate mutase 1, Phosphoglycerate mutase isozyme B (PGAM-B)	5	175	5.5
92	Q9R0K7	AT2B2	Plasma membrane calcium-transporting ATPase 2 (PMCA2)	8	199	6.3
93	O88737	BSN	Protein bassoon (Bassoon)	5	143	2.2
94	Q9D051	ODPB	Pyruvat dehydrogenase E1 component subunit beta, mitochondrial (PDHE1-B)	12	363	24.2
95	P52480-2	KPYM-2	Pyruvat kinase isozymes M1/M2, Isoform 2	12	241	16.8
96	P35486	ODPA	Pyruvate dehydrogenase E1 component subunit alpha, somatic form, mitochondrial (PDH1-A type I)	14	454	10.8
97	P50396	GDIA	Rab GDP dissociation inhibitor alpha (Rab GDI alpha)	9	205	15.9
98	Q61598	GDIB	Rab GDP dissociation inhibitor beta (Rab GDI beta)	6	157	11.2
99	F6SEU4	SYGP1	Ras GTPase-activating protein SynGAP, Synaptic Ras GTPase-activating protein 1 (Synaptic Ras-GAP 1)	5	75	2.6
100	P63001	RAC1	Ras-related C3 botulinum toxin substrate 1, p21-Rac1	6	154	11.5
101	P61027	RAB10	Ras-related protein Rab-10	14	403	16.5
102	P61226	RAP2B	Ras-related protein Rap-2b	5	136	6.6
103	Q8C1B7	SEP11	Septin-11	11	203	8.4
104	Q9Z2Q6	SEPT5	Septin-5, Cell division control-related protein 1 (CDCrel-1), Peanut-like protein 1	10	162	13.8
105	O55131	SEPT7	Septin-7, CDC10 protein homolog	8	172	6.4
106	Q76MZ3	2AAA	Serine/threonine-protein phosphatase 2A 65 kDa regulatory subunit A isoform, PP2A subunit A isoform PR65-alpha	5	151	7.8
107	Q8VDN2	AT1A1	Sodium/potassium-transporting ATPase subunit alpha-1 (Na+/K+-ATPase alpha-1 subunit)	58	1904	24.7
108	Q6PIE5	AT1A2	Sodium/potassium-transporting ATPase subunit alpha-2 (Na+/K+-ATPase alpha-2 subunit)	66	2473	28.6
109	Q6PIC6	AT1A3	Sodium/potassium-transporting ATPase subunit alpha-3 (Na+/K+-ATPase alpha-3 subunit)	71	2722	28.5
110	P14094	AT1B1	Sodium/potassium-transporting ATPase subunit beta-1 (Na+/K+-ATPase beta-1 subunit)	21	604	19.1
111	P14231	AT1B2	Sodium/potassium-transporting ATPase subunit beta-2 (Na+/K+-ATPase beta-2 subunit)	4	102	8.6
112	P16546	SPTN1	Spectrin alpha chain, brain, (non-erythrocytic 1)	36	1331	16.1
113	Q62261	SPTB2	Spectrin beta chain, brain, (non-erythrocytic 1)	16	358	7.4
114	P38647	GRP75	Stress-70 protein, mitochondrial	10	324	11.8
115	O88935	SYN1	Synapsin-1	18	483	15.6
116	Q64332	SYN2	Synapsin-2	11	307	14.3
117	Q8R191	SNG3	Synaptogyrin-3	3	117	6.6
118	P60879	SNP25	Synaptosomal-associated protein 25 (SNAP-25)	14	513	27.7
119	P46096	SYT1	Synaptotagmin-1 (Syt-1, SytI)	19	633	25.7
120	P61264	STX1B	Syntaxin-1B	16	494	34.4
121	O08599	STXB1	Syntaxin-binding protein 1, Protein unc-18 homolog 1 (Unc18-1)	34	1197	33
122	P01831	THY1	Thy-1 membrane glycoprotein	13	492	22.8
123	Q8BMS1	ECHA	Trifunctional enzyme subunit alpha, mitochondrial (TP-alpha)	4	87	6.2
124	P68369	TBA1A	Tubulin alpha-1A chain (Alpha-tubulin 1)	82	2167	41
125	P05213	TBA1B	Tubulin alpha-1B chain (Alpha-tubulin 2)	62	1977	41
126	P68368	TBA4A	Tubulin alpha-4A chain (Alpha-tubulin 4)	55	1699	36.8
127	Q7TMM9	TBB2A	Tubulin beta-2A chain	79	2930	45.6
128	Q9ERD7	TBB3	Tubulin beta-3 chain	64	2450	37.8
129	Q9D6F9	TBB4A	Tubulin beta-4A chain, Tubulin beta-4 chain	70	2294	38.5
130	P68372	TBB4B	Tubulin beta-4B chain, Tubulin beta-2C chain	80	2901	45.6
131	Q02053	UBA1	Ubiquitin-like modifier-activating enzyme 1	4	107	8.2
132	Q99104	MYO5A	Unconventional myosin-Va	5	141	4.9
133	P63044	VAMP2	Vesicle-associated membrane protein 2 (VAMP-2), Synaptobrevin-2	10	581	28.4
134	P46460	NSF	Vesicle-fusion ATPase, Vesicular-fusion protein NSF	29	650	20.7
135	Q60931	VDAC3	Voltage-dependent anion-selective channel protein 3 (VDAC-3)	13	635	8.1
136	P50516	VATA	V-type proton ATPase catalytic subunit A (V-ATPase subunit A)	22	635	27.1
137	P62814	VATB2	V-type proton ATPase subunit B	20	520	21.9
138	P51863	VA0D1	V-type proton ATPase subunit d 1 (V-ATPase subunit d 1)	4	117	9.1
139	Q8BVE3	VATH	V-type proton ATPase subunit H (V-ATPase subunit H)	13	224	13.9

## Sheet: Cerebellum
No.	UniProt Entry	UniProt (Mouse)	Description	Most Pep.	Score for Most Pep.	SC for Most Pep. (%)		Cerebellum
1	Q64433	CH10	10 kDa heat shock protein, mitochondrial (Hsp10), Chaperonin 10 (CPN10)	3	168	29.4
2	P62259	1433E	14-3-3 protein epsilon (14-3-3E)	6	164	15.7
3	P61982	1433G	14-3-3 protein gamma	5	106	20.6
4	P63101	1433Z	14-3-3 protein zeta/delta, Protein kinase C inhibitor protein 1 (KCIP-1)	10	314	36.7
5	P16330	CN37	2',3'-cyclic-nucleotide 3'-phosphodiesterase (CNP, CNPase)	27	861	32.1
6	P61922	GABT	4-aminobutyrate aminotransferase, mitochondrial, GABA aminotransferase (GABA-AT)	11	244	11.4
7	P63038	CH60	60 kDa heat shock protein, mitochondrial, HSP-65	14	338	24.4
8	P20029	GRP78	78 kDa glucose-regulated protein (GRP-78)	11	335	9.9
9	Q99KI0	ACON	Aconitate hydratase, mitochondrial (Aconitase)	26	830	31
10	P68033	ACTC	Actin, alpha cardiac muscle 1	25	916	30
11	P60710	ACTB	Actin, cytoplasmatic 1	29	1246	44.8
12	P48962	ADT1	ADP/ATP translocase 1	15	379	24.2
13	P51881	ADT2	ADP/ATP translocase 2	9	266	26.2
14	P17182	ENOA	Alpha-enolase	17	580	28.6
15	P48036	ANXA5	Annexin A5	4	206	13.2
16	Q9DBG3	AP2B1	AP-2 complex subunit beta	9	270	5.7
17	P05202	AATM	Aspartate aminotransferase, mitochondrial (mAspAT)	9	391	24.4
18	Q03265	ATPA	ATP synthase subunit alpha, mitochondrial	31	1028	38
19	P56480	ATPB	ATP synthase subunit beta, mitochondrial	65	2308	61.6
20	Q9DCX2	ATP5H	ATP synthase subunit d, mitochondrial (ATPase subunit d)	4	69	23.6
21	Q9DB20	ATPO	ATP synthase subunit O, mitochondrial, Oligomycin sensitivity conferral protein (OSCP)	15	561	37.6
22	P12658	CALB1	Calbindin	4	66	9.2
23	P11798	KCC2A	Calcium/calmodulin-dependent protein kinase type II subunit alpha (CaM Kinase II subunit alpha, CaMK-II subunit alpha)	10	279	15.9
24	P28652	KCC2B	Calcium/calmodulin-dependent protein kinase type II subunit beta (CaM Kinase II subunit beta, CaMK-II subunit beta)	13	438	14
25	Q923T9	KCC2G	Calcium/calmodulin-dependent protein kinase type II subunit gamma (CaM kinase II subunit gamma, CaMK-II subunit gamma)	8	306	12.3
26	Q8BH59	CMC1	Calcium-binding mitochondrial carrier protein Aralar1, Mitochondrial aspartate glutamate carrier 1	13	292	14.6
27	Q9JKC6	CEND	Cell cycle exit and neuronal differentiation protein 1, BM88 antigen	5	305	19.5
28	P60766	CDC42	Cell division control protein 42 homolog, G25K GTP-binding protein	6	247	8.9
29	Q9CZU6	CISY	Citrate synthase, mitochondrial	17	461	30.6
30	Q68FD5	CLH1	Clathrin heavy chain 1	14	245	10.2
31	P18760	COF1	Cofilin-1	7	155	37.3
32	Q04447	KCRB	Creatine kinase B-type (B-CK)	27	954	43.6
33	P30275	KCRU	Creatine kinase U-type, mitochondrial	7	147	31.8
34	Q9DB77	QCR2	Cytochrome b-c1 complex subunit 2, mitochondrial, Complex III subunit 2, Core protein II	13	412	31.3
35	P00405	COX2	Cytochrome c oxidase subunit 2, Cytochrome c oxidase polypeptide II	6	126	20.3
36	P12787	COX5A	Cytochrome c oxidase subunit 5A, mitochondrial	5	101	47.9
37	O08749	DLDH	Dihydrolipoyl dehydrogenase, mitochondrial	8	109	6.5
38	Q8BMF4	ODP2	Dihydrolipoyllysine-residue acetyltransferase component of pyruvate dehydrogenase complex, mitochondrial (PDC-E2)	8	217	11.5
39	O08553	DPYL2	Dihydropyrimidinase-related protein 2 (DRP-2), Unc-33-like phosphoprotein 2 (ULIP-2)	21	473	31.6
40	Q9Z218	DPP6	Dipeptidyl aminopeptidase-like protein 6, DPPX, Dipeptidyl peptidase VI (DPP VI)	3	132	5.5
41	O88343	S4A4	Electrogenic sodium bicarbonate cotransporter 1 (Sodium bicarbonate cotransporter), Na(+)/HCO3(-) cotransporter	9	345	10.8
42	P62631	EF1A2	Elongation factor 1-alpha 2 (EF-1-alpha-2), Eukaryotic elongation factor 1 A-2 (eEF1A-2)	3	97	9.9
43	P56564	EAA1	Excitatory amino acid transporter 1, High-affinity neuronal glutamate transporter, Sodium-dependent glutamate/aspartate transporter 1 (GLAST-1)	20	910	5.9
44	P43006	EAA2	Excitatory amino acid transporter 2, GLT-1 , Sodium-dependent glutamate/aspartate transporter 2	15	635	15.7
45	P05064	ALDOA	Fructose-bisphosphate aldolase A	7	148	19.8
46	P05063	ALDOC	Fructose-bisphosphate aldolase C, Brain-type aldolase	20	578	29.5
47	P17183	ENOG	Gamma-enolase, Neuron-specific enolase (NSE)	9	336	26
48	P10649	GSTM1	Glutathione S-transferase Mu 1, GST 1-1, pmGT10	9	260	37.2
49	P16858	G3P	Glyceraldehyde-3-phosphate dehydrogenase (GAPDH)	17	741	25.5
50	P62874	GBB1	Guanine nucleotide-binding protein G(I)/G(S)/G(T) subunit beta-1, Transducin beta chain 1	8	212	9.4
51	P18872	GNAO	Guanine nucleotide-binding protein G(o) subunit alpha	19	698	29.4
52	P21279	GNAQ	Guanine nucleotide-binding protein G(q) subunit alpha	8	224	17
53	P63017	HSP7C	Heat shock cognate 71 kDa protein, Heat shock 70 kDa protein 8	33	1095	27.6
54	P11499	HS90B	Heat shock protein HSP 90-beta, Heat shock 84 kDa (HSP 84)	5	164	5.4
55	P17156	HSP72	Heat shock-related 70 kDa protein 2 (Heat shock protein 70.2)	6	125	8.7
56	P17710	HXK1	Hexokinase-1	4	166	3.7
57	P15864	H12	Histone H1.2	8	282	16
58	P43274	H14	Histone H1.4	7	266	15.1
59	P43276	H15	Histone H1.5	5	151	10.3
60	Q6GSS7	H2A2	Histone H2A type 2-A	17	767	21.5
61	Q6ZWY9	H2B1C	Histone H2B type 1-C/E/G	18	748	23.8
62	P62806	H4	Histone H4	31	1038	51.5
63	Q99JP6	HOME3	Homer protein homolog 3	4	170	14.6
64	P11881	ITPR1	Inositol 1,4,5-trisphosphate receptor type 1	46	1123	11.2
65	Q9D6R2	IDH3A	Isocitrate dehydrogenase [NAD] subunit alpha, mitochondrial	8	266	19.7
66	P70202	LXN	Latexin	3	78	5.4
67	Q61735	CD47	Leukocyte surface antigen CD47, Integrin-associated protein (IAP)	3	153	4.6
68	Q99JY8	LPP3	Lipid phosphate phosphohydrolase 3, Phosphatidic acid phosphohydrolase type 2b (PAP-2b)	4	102	3.5
69	P16125	LDHB	L-lactate dehydrogenase B chain (LDH-B)	9	239	24.3
70	P34884	MIF	Macrophage migration inhibitory factor (MIF)	4	95	9.6
71	P14152	MDHC	Malate dehydrogenase, cytoplasmic	5	111	10.5
72	P08249	MDHM	Malate dehydrogenase, mitochondrial	30	1195	28.7
73	P60202	MYPR	Myelin proteolipid protein (PLP)	10	290	11.6
74	Q61885	MOG	Myelin-oligodendrocyte glycoprotein	9	419	8.9
75	Q9ERS2	NDUAD	NADH dehydrogenase [ubiquinone] 1 alpha subcomplex subunit 13, Cell death regulatory protein GRIM-19	4	84	16.7
76	Q9DC69	NDUA9	NADH dehydrogenase [ubiquinone] 1 alpha subcomplex subunit 9, mitochondrial (Complex I 39 kDa)	4	109	10.3
77	Q9D6J6	NDUV2	NADH dehydrogenase [ubiquinone] flavoprotein 2, mitochondrial	3	201	24.6
78	Q9DCT2	NDUS3	NADH dehydrogenase [ubiquinone] iron-sulfur protein 3, mitochondrial (Complex I-30kD)	6	201	19.4
79	Q91VD9	NDUS1	NADH-ubiquinone oxidoreductase 75 kDa subunit, mitochondrial	12	199	12.9
80	P35802	GPM6A	Neuronal membrane glycoprotein M6-a (M6a)	4	264	9
81	P17742	PPIA	Peptidyl-prolyl cis-trans isomerase A (PPIase A)	3	145	25.6
82	P35700	PRDX1	Peroxiredoxin-1, Thioredoxin peroxidase 2	2	51	5
83	P99029	PRDX5	Peroxiredoxin-5, mitochondrial	9	175	22.4
84	O08709	PRDX6	Peroxiredoxin-6	3	54	27.7
85	Q8VEM8	MPCP	Phosphate carriar protein, mitochondrial; phospate transport protein (PTP)	10	340	18.2
86	P70296	PEBP1	Phosphatidylethanolamine-binding protein 1 (PEBP-1)	5	180	14.4
87	Q9DBJ1	PGAM1	Phosphoglycerate mutase 1, Phosphoglycerate mutase isozyme B (PGAM-B)	4	112	9.8
88	Q9R0K7	AT2B2	Plasma membrane calcium-transporting ATPase 2 (PMCA2)	32	1212	13.8
89	E9PUL5	PRRT2	Proline-rich transmembrane protein 2, Dispanin subfamily B member 3 (DSPB3)	5	130	17.3
90	Q9QYG0	NDRG2	Protein NDRG2	8	242	14.6
91	Q9D051	ODPB	Pyruvat dehydrogenase E1 component subunit beta, mitochondrial (PDHE1-B)	11	314	27.9
92	P52480-2	KPYM-2	Pyruvat kinase isozymes M1/M2, Isoform 2	7	160	12.8
93	P35486	ODPA	Pyruvate dehydrogenase E1 component subunit alpha, somatic form, mitochondrial (PDH1-A type I)	7	274	17.2
94	P63001	RAC1	Ras-related C3 botulinum toxin substrate 1, p21-Rac1	4	165	11.5
95	P61027	RAB10	Ras-related protein Rab-10	8	293	21
96	P62821	RAB1A	Ras-related protein Rab-1A	7	195	26.8
97	Q8VDN2	AT1A1	Sodium/potassium-transporting ATPase subunit alpha-1 (Na+/K+-ATPase alpha-1 subunit)	94	3436	28.6
98	Q6PIE5	AT1A2	Sodium/potassium-transporting ATPase subunit alpha-2 (Na+/K+-ATPase alpha-2 subunit)	103	3901	37.4
99	Q6PIC6	AT1A3	Sodium/potassium-transporting ATPase subunit alpha-3 (Na+/K+-ATPase alpha-3 subunit)	93	3359	30.3
100	P14094	AT1B1	Sodium/potassium-transporting ATPase subunit beta-1 (Na+/K+-ATPase beta-1 subunit)	17	434	17.8
101	Q91V14	S12A5	Solute carrier family 12 member 5	10	279	6.9
102	P16546	SPTN1	Spectrin alpha chain, brain, (non-erythrocytic 1)	27	807	16.5
103	Q62261	SPTB2	Spectrin beta chain, brain, (non-erythrocytic 1)	16	329	8.9
104	Q9CQA3	DHSB	Succinate dehydrogenase [ubiquinone] iron-sulfur subunit, mitochondrial	2	42	8.2
105	P09671	SODM	Superoxide dismutase [Mn], mitochondrial	6	126	12.6
106	O88935	SYN1	Synapsin-1	8	213	9.8
107	P60879	SNP25	Synaptosomal-associated protein 25 (SNAP-25)	14	456	33
108	P46096	SYT1	Synaptotagmin-1 (Syt-1, SytI)	10	338	15
109	P46097	SYT2	Synaptotagmin-2 (Syt-2, SytII)	10	385	23.7
110	P61264	STX1B	Syntaxin-1B	33	1322	39.2
111	O08599	STXB1	Syntaxin-binding protein 1, Protein unc-18 homolog 1 (Unc18-1)	37	1486	45.3
112	P01831	THY1	Thy-1 membrane glycoprotein	7	214	22.8
113	P68369	TBA1A	Tubulin alpha-1A chain (Alpha-tubulin 1)	29	912	39
114	P05213	TBA1B	Tubulin alpha-1B chain (Alpha-tubulin 2)	29	959	39
115	P68368	TBA4A	Tubulin alpha-4A chain (Alpha-tubulin 4)	25	675	32.6
116	Q7TMM9	TBB2A	Tubulin beta-2A chain	35	1354	39.6
117	Q9ERD7	TBB3	Tubulin beta-3 chain	31	1232	31.8
118	Q9D6F9	TBB4A	Tubulin beta-4A chain, Tubulin beta-4 chain	45	1374	44.6
119	P68372	TBB4B	Tubulin beta-4B chain, Tubulin beta-2C chain	42	1379	43.6
120	P99024	TBB5	Tubulin beta-5 chain	34	1306	33.1
121	P63044	VAMP2	Vesicle-associated membrane protein 2 (VAMP-2), Synaptobrevin-2	8	375	28.4
122	P46460	NSF	Vesicle-fusion ATPase, Vesicular-fusion protein NSF	13	226	17.6
123	P62761	VISL1	Visinin-like protein 1 (VILIP), Neural visinin-like protein 1 (NVL-1, NVP-1)	4	83	18.3
124	Q60932	VDAC1	Voltage-dependent anion-selective channel protein 1 (VDAC-1)	9	377	22
125	Q60931	VDAC3	Voltage-dependent anion-selective channel protein 3 (VDAC-3)	8	363	12
126	P50516	VATA	V-type proton ATPase catalytic subunit A (V-ATPase subunit A)	22	729	23.5
127	P62814	VATB2	V-type proton ATPase subunit B	11	296	21.3
128	P51863	VA0D1	V-type proton ATPase subunit d 1 (V-ATPase subunit d 1)	5	115	11.7
129	P50518	VATE1	V-type proton ATPase subunit E 1 (V-ATPase subunit E 1), V-ATPase 31 kDA subunit (p31)	12	307	20.8
